# Supplementary material for: Structural and digestibility characterization of soybean protein, textured soybean-based protein and chicken breast: a comparative study
Source: Royal Society of Chemistry journal article supplement (doi:10.1039/d4fo03963g), 2025-01-01
Supplement: d4fo03963g1.pdf [file d4fo03963g1.pdf]

1   **Table S1**

2   The extrusion parameters of soybean-based high-moisture textured vegetable protein

3   (SH) and soybean-based low-moisture textured vegetable protein (SL) (both SH and

4   SL were produced using a twin-screw extruder with 7 independent temperature control

5   systems).

| TVP | Barrel<br>temperature<br>(°C) | Feeding<br>rate<br>(kg/h) | Water<br>rate<br>(kg/h) | Moisture<br>content<br>(%) | Moisture<br>content<br>after<br>rehydration<br>(%) | Screw<br>speed<br>(rpm) | Cooling die<br>temperature<br>(°C) |
|-----|-------------------------------|---------------------------|-------------------------|----------------------------|----------------------------------------------------|-------------------------|------------------------------------|
| SH  | 40,60,80,120,<br>140,135,100  | 3.7                       | 4.8                     | 61.30                      | /                                                  | 200                     | 70                                 |
| SL  | 30,50,80,120,<br>150,150,150  | 3.5                       | 1.6                     | 27.12                      | 60.12                                              | 250                     | /                                  |

6

## 7 Table S2

8 Preparation method of 400 mL simulated salivary fluid (SSF), simulated gastric fluid

9 (SGF), and simulated intestinal fluid (SIF) with 1.25× concentrations.

| Solution                                                 | SSF (pH = 7.0)             |                                 | SGF (pH = 3.0)             |                                 | SIF (pH = 7.0)             |                                 |
|----------------------------------------------------------|----------------------------|---------------------------------|----------------------------|---------------------------------|----------------------------|---------------------------------|
|                                                          | Solution added volume (mL) | Final concentration in SSF (mM) | Solution added volume (mL) | Final concentration in SGF (mM) | Solution added volume (mL) | Final concentration in SIF (mM) |
| 0.5 M KCl                                                | 15.1                       | 15.1                            | 6.9                        | 6.9                             | 6.8                        | 6.8                             |
| 0.5 M KH <sub>2</sub> PO <sub>4</sub>                    | 3.7                        | 3.7                             | 0.9                        | 0.9                             | 0.8                        | 0.8                             |
| 2 M NaCl                                                 | 3.4                        | 13.6                            | 18.05                      | 72.2                            | 30.85                      | 123.4                           |
| 0.15 M MgCl <sub>2</sub> (H <sub>2</sub> O) <sub>6</sub> | 0.5                        | 0.15                            | 0.4                        | 0.12                            | 1.1                        | 0.33                            |
| 0.5 M (NH <sub>4</sub> ) <sub>2</sub> CO <sub>3</sub>    | 0.06                       | 0.06                            | 0.5                        | 0.5                             | /                          | /                               |
| 1 M HCl                                                  | 0.54                       | 1.1                             | 7.8                        | 15.6                            | 4.2                        | 8.4                             |

10 Note: After preparing the simulated digestive solutions, the pH of SSF, SGF and SIF

11 were adjusted to 7.0, 3.0 and 7.0 respectively using 1 M HCl and 1 M NaOH.

12
